# Supplementary material for: Measuring case severity: a novel tool for benchmarking and clinical documentation improvement
Source: Springer Nature journal article supplement (doi:10.1186/s12913-022-07935-1), 2022-04-15

**Supplementary table 1. Proportion of Elixhauser comorbidities and body system levels for training dataset and testing dataset.**

|                               | Level | Training Dataset | Testing Dataset | P-value |
|-------------------------------|-------|------------------|-----------------|---------|
| <b>Elixhauser Comorbidity</b> |       |                  |                 |         |
| CHF                           | No    | 588846 (85.04%)  | 196101 (84.96%) | 0.36    |
|                               | Yes   | 103604 (14.96%)  | 34715 (15.04%)  |         |
| VALVE                         | No    | 627185 (90.57%)  | 209214 (90.64%) | 0.35    |
|                               | Yes   | 65265 (9.43%)    | 21602 (9.36%)   |         |
| PULMCIRC                      | No    | 681265 (98.38%)  | 226943 (98.32%) | 0.04    |
|                               | Yes   | 11185 (1.62%)    | 3873 (1.68%)    |         |
| PERIVASC                      | No    | 650157 (93.90%)  | 216618 (93.85%) | 0.45    |
|                               | Yes   | 42293 (6.10%)    | 14198 (6.15%)   |         |
| HTN                           | No    | 513930 (74.22%)  | 171443 (74.28%) | 0.58    |
|                               | Yes   | 178520 (25.78%)  | 59373 (25.72%)  |         |
| HTNCX                         | No    | 681320 (98.39%)  | 227196 (98.43%) | 0.20    |
|                               | Yes   | 11130 (1.61%)    | 3620 (1.57%)    |         |
| PARA                          | No    | 661732 (95.56%)  | 220602 (95.57%) | 0.83    |
|                               | Yes   | 30718 (4.44%)    | 10214 (4.43%)   |         |
| NEURO                         | No    | 612138 (88.40%)  | 203905 (88.34%) | 0.43    |
|                               | Yes   | 80312 (11.60%)   | 26911 (11.66%)  |         |
| CHRN LUNG                     | No    | 571963 (82.60%)  | 190251 (82.43%) | 0.06    |
|                               | Yes   | 120487 (17.40%)  | 40565 (17.57%)  |         |
| DM                            | No    | 637018 (91.99%)  | 212200 (91.93%) | 0.36    |
|                               | Yes   | 55432 (8.01%)    | 18616 (8.07%)   |         |

|          |     |                 |                 |      |
|----------|-----|-----------------|-----------------|------|
| DMCX     | No  | 599599 (86.59%) | 199945 (86.63%) | 0.68 |
|          | Yes | 92851 (13.41%)  | 30871 (13.38%)  |      |
| HYPOTHY  | No  | 613063 (88.53%) | 204285 (88.51%) | 0.70 |
|          | Yes | 79387 (11.47%)  | 26531 (11.49%)  |      |
| RENLFAIL | No  | 585913 (84.61%) | 195213 (84.58%) | 0.65 |
|          | Yes | 106537 (15.39%) | 35603 (15.42%)  |      |
| LIVER    | No  | 647167 (93.46%) | 215876 (93.53%) | 0.26 |
|          | Yes | 45283 (6.54%)   | 14940 (6.47%)   |      |
| ULCER    | No  | 684332 (98.83%) | 228184 (98.86%) | 0.22 |
|          | Yes | 8118 (1.17%)    | 2632 (1.14%)    |      |
| AIDS     | No  | 688077 (99.37%) | 229337 (99.36%) | 0.64 |
|          | Yes | 4373 (0.63%)    | 1479 (0.64%)    |      |
| LYMPH    | No  | 673970 (97.33%) | 224596 (97.31%) | 0.51 |
|          | Yes | 18480 (2.67%)   | 6220 (2.69%)    |      |
| METS     | No  | 649655 (93.82%) | 216452 (93.78%) | 0.46 |
|          | Yes | 42795 (6.18%)   | 14364 (6.22%)   |      |
| TUMOR    | No  | 620757 (89.65%) | 206945 (89.66%) | 0.88 |
|          | Yes | 71693 (10.35%)  | 23871 (10.34%)  |      |
| ARTH     | No  | 668203 (96.50%) | 222767 (96.51%) | 0.75 |
|          | Yes | 24247 (3.50%)   | 8049 (3.49%)    |      |
| COAG     | No  | 636530 (91.92%) | 212104 (91.89%) | 0.64 |
|          | Yes | 55920 (8.08%)   | 18712 (8.11%)   |      |
| OBESE    | No  | 590805 (85.32%) | 196722 (85.23%) | 0.28 |
|          | Yes | 101645 (14.68%) | 34094 (14.77%)  |      |

|          |     |                 |                 |      |
|----------|-----|-----------------|-----------------|------|
| WGHTLOSS | No  | 620925 (89.67%) | 206954 (89.66%) | 0.91 |
|          | Yes | 71525 (10.33%)  | 23862 (10.34%)  |      |
| LYTES    | No  | 523713 (75.63%) | 174461 (75.58%) | 0.65 |
|          | Yes | 168737 (24.37%) | 56355 (24.42%)  |      |
| BLDLOSS  | No  | 672955 (97.18%) | 224386 (97.21%) | 0.46 |
|          | Yes | 19495 (2.815%)  | 6430 (2.786%)   |      |
| ANEMDEF  | No  | 570946 (82.45%) | 190236 (82.42%) | 0.71 |
|          | Yes | 121504 (17.55%) | 40580 (17.58%)  |      |
| ALCOHOL  | No  | 667283 (96.37%) | 222542 (96.42%) | 0.27 |
|          | Yes | 25167 (3.63%)   | 8274 (3.58%)    |      |
| DRUG     | No  | 670153 (96.78%) | 223349 (96.77%) | 0.73 |
|          | Yes | 22297 (3.22%)   | 7467 (3.23%)    |      |
| PSYCH    | No  | 662402 (95.66%) | 220691 (95.61%) | 0.34 |
|          | Yes | 30048 (4.34%)   | 10125 (4.39%)   |      |
| DEPRESS  | No  | 597035 (86.22%) | 199069 (86.25%) | 0.76 |
|          | Yes | 95415 (13.78%)  | 31747 (13.75%)  |      |

Body System Indicators

|                                      |   |                 |                 |      |
|--------------------------------------|---|-----------------|-----------------|------|
| 1- Infectious and parasitic diseases | 0 | 561092 (81.03%) | 186933 (80.99%) | 0.77 |
|                                      | 1 | 87959 (12.70%)  | 29320 (12.70%)  |      |
|                                      | 2 | 43399 (6.27%)   | 14563 (6.31%)   |      |
| 2- Neoplasms                         | 0 | 548693 (79.24%) | 182876 (79.23%) | 0.38 |
|                                      | 1 | 68103 (9.84%)   | 22536 (9.76%)   |      |

|                                                                          |   |                 |                 |      |
|--------------------------------------------------------------------------|---|-----------------|-----------------|------|
|                                                                          | 2 | 75654 (10.92%)  | 25404 (11.01%)  |      |
| 3- Endocrine; nutritional; and metabolic diseases and immunity disorders | 0 | 263794 (38.10%) | 87815 (38.05%)  | 0.83 |
|                                                                          | 1 | 278041 (40.15%) | 92846 (40.22%)  |      |
|                                                                          | 2 | 150615 (21.75%) | 50155 (21.73%)  |      |
| 4- Diseases of the blood and blood-forming organs                        | 0 | 453479 (65.49%) | 151177 (65.50%) | 0.98 |
|                                                                          | 1 | 145418 (21.00%) | 48433 (20.98%)  |      |
|                                                                          | 2 | 93553 (13.51%)  | 31206 (13.52%)  |      |
| 5- Mental disorders                                                      | 0 | 444045 (64.13%) | 148215 (64.21%) | 0.75 |
|                                                                          | 1 | 207090 (29.91%) | 68850 (29.83%)  |      |
|                                                                          | 2 | 41315 (5.96%)   | 13751 (5.96%)   |      |
| 6- Diseases of the nervous system and sense organs                       | 0 | 410423 (59.27%) | 136737 (59.24%) | 0.63 |
|                                                                          | 1 | 212015 (30.62%) | 70865 (30.70%)  |      |
|                                                                          | 2 | 70012 (10.11%)  | 23214 (10.06%)  |      |
| 7- Diseases of the circulatory system                                    | 0 | 292984 (42.31%) | 97358 (42.18%)  | 0.54 |
|                                                                          | 1 | 217933 (31.47%) | 72781 (31.53%)  |      |
|                                                                          | 2 | 181533 (26.22%) | 60677 (26.29%)  |      |
| 8- Diseases of the respiratory system                                    | 0 | 475197 (68.63%) | 157952 (68.43%) | 0.20 |
|                                                                          | 1 | 107128 (15.47%) | 36276 (15.72%)  |      |
|                                                                          | 2 | 110125 (15.90%) | 36588 (15.85%)  |      |

|                                                                |   |                 |                    |      |
|----------------------------------------------------------------|---|-----------------|--------------------|------|
| 9- Diseases of the digestive system                            | 0 | 403359 (58.25%) | 134513<br>(58.28%) | 0.28 |
|                                                                | 1 | 208637 (30.13%) | 69755 (30.22%)     |      |
|                                                                | 2 | 80454 (11.62%)  | 26548 (11.50%)     |      |
| 10- Diseases of the genitourinary system                       | 0 | 457288 (66.04%) | 152303<br>(65.98%) | 0.89 |
|                                                                | 1 | 87238 (12.60%)  | 29127 (12.62%)     |      |
|                                                                | 2 | 147924 (21.36%) | 49386 (21.40%)     |      |
| 11- Complications of pregnancy; childbirth; and the puerperium | 0 | 628894 (90.82%) | 209642<br>(90.83%) | 0.54 |
|                                                                | 1 | 42124 (6.08%)   | 14122 (6.12%)      |      |
|                                                                | 2 | 21432 (3.10%)   | 7052 (3.05%)       |      |
| 12- Diseases of the skin and subcutaneous tissue               | 0 | 618728 (89.35%) | 206096<br>(89.29%) | 0.18 |
|                                                                | 1 | 46774 (6.75%)   | 15539 (6.73%)      |      |
|                                                                | 2 | 26948 (3.89%)   | 9181 (3.98%)       |      |
| 13- Diseases of the musculoskeletal system                     | 0 | 495621 (71.58%) | 165194<br>(71.57%) | 0.83 |
|                                                                | 1 | 171189 (24.72%) | 57134 (24.75%)     |      |
|                                                                | 2 | 25640 (3.70%)   | 8488 (3.68%)       |      |
| 14- Congenital anomalies                                       | 0 | 642630 (92.81%) | 214367<br>(92.87%) | 0.55 |
|                                                                | 1 | 23806 (3.44%)   | 7862 (3.41%)       |      |
|                                                                | 2 | 26014 (3.75%)   | 8587 (3.72%)       |      |

|                                                                        |   |                 |                 |      |
|------------------------------------------------------------------------|---|-----------------|-----------------|------|
| 15- Certain conditions originating in the perinatal period             | 0 | 649717 (93.83%) | 216698 (93.88%) | 0.63 |
|                                                                        | 1 | 34433 (4.97%)   | 11387 (4.93%)   |      |
|                                                                        | 2 | 8300 (1.20%)    | 2731 (1.18%)    |      |
| 16- Symptoms, signs, and ill-defined conditions                        | 0 | 388150 (56.05%) | 129040 (55.90%) | 0.22 |
|                                                                        | 1 | 218708 (31.59%) | 73348 (31.78%)  |      |
|                                                                        | 2 | 85592 (12.36%)  | 28428 (12.32%)  |      |
| 17- Injury and poisoning                                               | 0 | 527287 (76.15%) | 175717 (76.13%) | 0.75 |
|                                                                        | 1 | 116392 (16.81%) | 38737 (16.78%)  |      |
|                                                                        | 2 | 48771 (7.04%)   | 16362 (7.09%)   |      |
| 18- Factors influencing health status and contact with health services | 0 | 84282 (12.17%)  | 28237 (12.23%)  | 0.20 |
|                                                                        | 1 | 534097 (77.13%) | 178180 (77.20%) |      |
|                                                                        | 2 | 74071 (10.70%)  | 24399 (10.57%)  |      |

Supplementary figure 1. Proportion of cases with high severity of illness on admission.

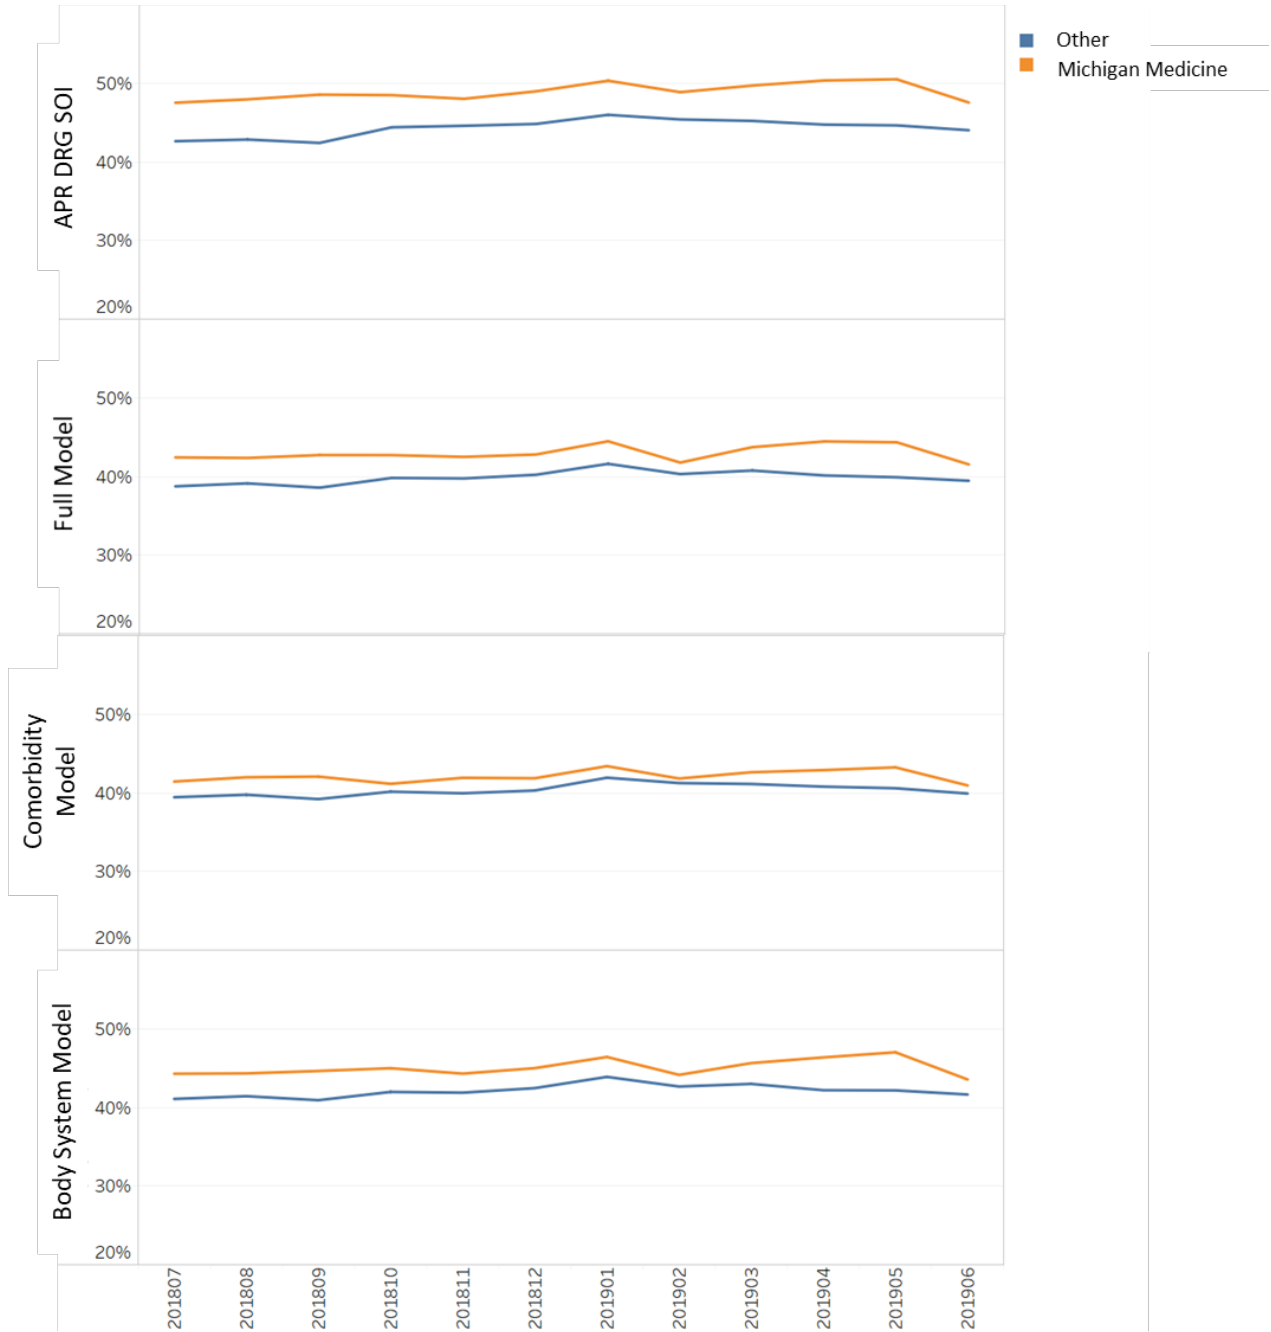

Supplement: MOESM1 [file 20315644]
